# Supplementary material
Source: PubMed Central journal article supplement (PMC3421617)
Supplement: AAC.00360-12_zac999101074so1.pdf [file AAC.00360-12_zac999101074so1.pdf]

1 Warren et al. PS Hoffman corresponding author.

2 Supplemental material

### 3 **S1. Chemical Synthesis**

4 **General Synthetic Materials and Methods.** All nonaqueous reactions were carried out  
5 in oven or flame-dried glassware under an argon or nitrogen atmosphere with dry solvents and  
6 magnetic stirring, unless otherwise stated. The argon and nitrogen were dried by passing through  
7 a tube of Drierite. Anhydrous diethyl ether (Et<sub>2</sub>O), chloroform (CHCl<sub>3</sub>), Dimethyl sulfoxide  
8 (DMSO), ethyl acetate (EtOAc), dichloromethane (CH<sub>2</sub>Cl<sub>2</sub>), methanol (MeOH), ethanol (EtOH),  
9 and tetrahydrofuran (THF) and *N,N*-dimethylformamide (DMF) were purchased from Aldrich or  
10 VMR Chemicals and used as received. THF was dried over activated molecular sieves (4 Å)  
11 prior to use. All other reagents were purchased from Acros chemicals and Aldrich chemicals.  
12 Except as indicated otherwise, reactions were monitored by thin layer chromatography (TLC)  
13 using 0.25 mm Whatman precoated silica gel plates. Flash chromatography was performed with  
14 the indicated solvents and Dynamic Adsorbents silica gel (particle size 0.023 – 0.040 mm).  
15 Proton (<sup>1</sup>H) and carbon (<sup>13</sup>C) NMR spectra were recorded on a Varian UnityInova 500/51 or  
16 Varian UnityInova 300/54 at 300K unless otherwise noted. Chemical shifts are reported in ppm  
17 (δ) values relative to the solvent as follows: CDCl<sub>3</sub> (δ 7.24 for proton and δ 77.0 for carbon  
18 NMR), DMSO-d<sub>6</sub> (δ 2.50 for proton and δ 39.5 for carbon NMR). All high-resolution mass  
19 spectrometry was carried out by the Mass Spectrometry Laboratory in the School of Chemical  
20 Sciences at the University of Illinois Urbana-Champaign (Urbana, IL).

21 Other abbreviations: 1,1'-bis(diphenylphosphino)ferrocene (dppf), 4-  
22 dimethylaminopyridine (DMAP), 9-borabicyclo[3.3.1]nonane (9-BBN), acetic acid (AcOH),  
23 *N,N*-diisopropylethylamine (DIEA), 1-Ethyl-3-(3-dimethylaminopropyl)carbodiimide (EDC), 1-

1 hydroxybenzotriazole hydrate (HOBT), tert-butanol (tBuOH), triethylamine (TEA),  
2 trifluoroacetic acid (TFA).

3 **General Procedure A: Williamson Ether Synthesis.** To a solution of a phenol (1.0  
4 eq.), sodium iodide (1.1 eq.), alkyl bromide (1.5 eq.) in DMF (0.3 M) at rt was added finely  
5 ground anhydrous potassium carbonate (2.0 eq.), then heated 60 °C, and then let react for 12 h.  
6 The reaction was quenched with sat. NaHCO<sub>3</sub> (100x the volume of DMF) and extracted into  
7 EtOAc (100x the volume of DMF). The organic layer was washed 3x with neat water (100x the  
8 volume of DMF), dried with Na<sub>2</sub>SO<sub>4</sub>, evaporated to dryness, and immediately purified by flash  
9 chromatography.

10 **General Procedure B: Saponification.** A methyl ester (1.0 eq.) was dissolved in a  
11 mixture of MeOH:THF:H<sub>2</sub>O (1:1:1, 0.3 M) then LiOH•H<sub>2</sub>O (3.0 eq.) was added. The solution  
12 was stirred for 12 hours at 60 °C then cooled to rt and quenched with 1M HCl (100x the volume  
13 of the reaction) and extracted 3x into EtOAc (100x the volume of reaction). The organic layer  
14 was dried with Na<sub>2</sub>SO<sub>4</sub> and evaporated to a solid. No further purification was necessary.

15 **General Procedure C: Amide Coupling.** An aryl carboxylic acid (1.0 eq.), EDC (1.1  
16 eq.), HOBT (1.1 eq.), TEA (4.0 eq.) and DMAP (0.1 eq.) were dissolved in THF (0.1 M) and  
17 stirred for 15 mins. An aromatic amine (1.5 eq.) was then added in one portion and the reaction  
18 was stirred at 55 °C. Once judged complete by TLC analysis (~24h), the resulting suspension  
19 was diluted with EtOAc (100x the volume of reaction) and washed with 1M HCl (100x the  
20 volume of reaction), sat. NaHCO<sub>3</sub> (100x the volume of reaction) and then dried with Na<sub>2</sub>SO<sub>4</sub> and  
21 evaporation to dryness. The resulting residue was purified by flash column chromatography.

22 **General Procedure D: N-Boc Deprotection.** To a solution of a Boc protected amine in  
23 CH<sub>2</sub>Cl<sub>2</sub> (0.1 M) was added trifluoroacetic acid (equal volume to CH<sub>2</sub>Cl<sub>2</sub>) at rt and let stir for 2 h,

1 before being evaporated to dryness. The reaction residue was then treated with 6 N HCl (2 eq.)  
2 and then dry ether to induce crystallization of the amine•HCl salt, and the suspension evaporated  
3 to dryness. The salt was then dissolved in neat water, frozen, and the water removed via  
4 sublimation to yield the deprotected product.

5  
6 The synthesis of **VPC16a1011**, **VPC161183**, **VPC16b1094**, and **VPC161195** has previously  
7 been described (1).

8  
9 **Methyl 2-(2-((*tert*-butoxycarbonyl)amino)ethoxy)benzoate (1).**

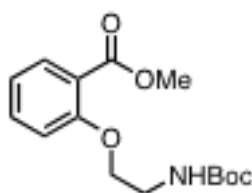

10  
11 General procedure A was used to couple methyl 2-hydroxybenzoate (2.0 mL, 15.4 mmol)  
12 and *tert*-butyl (2-bromoethyl)carbamate. Purified by flash chromatography (10 – 50 % ethyl  
13 acetate / hexanes) to yield 4.54 g of the title compound. 99%. Clear and colorless oil. <sup>1</sup>HNMR  
14 (300 MHz, DMSO) δ 7.64 (dd, J = 7.6, 1.1 Hz, 1H), 7.51 (td, J = 7.5, 0.9 Hz, 1H), 7.14 (d, J =  
15 8.4 Hz, 1H), 7.01 (dd, J = 14.6, 7.1 Hz, 1H), 6.83 (t, J = 5.3 Hz, 1H), 4.03 (t, J = 5.9 Hz, 2H),  
16 3.79 (s, J = 0.7 Hz, 3H), 3.31 (dd, J = 6.7, 5.5 Hz, 2H), 1.38 (s, 9H). <sup>13</sup>C NMR (75 MHz,  
17 DMSO) δ 166.37, 157.35, 155.57, 133.44, 130.66, 120.61, 120.47, 114.04, 77.82, 67.40, 51.81,  
18 38.98, 28.18.

19  
20 **2-(2-((*tert*-Butoxycarbonyl)amino)ethoxy)benzoic acid (2).**

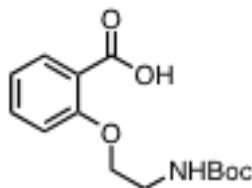

1  
2 General procedure B was used to hydrolyze methyl ester **1** (4.22 g, 14.29 mmol) to yield  
3 3.81 g of the title compound. 95%. White foam. <sup>1</sup>H NMR (300 MHz, DMSO) δ 12.53 (s, 1H),  
4 7.64 (dd, J = 7.6, 1.6 Hz, 1H), 7.49 (t, J = 7.9 Hz, 1H), 7.14 (d, J = 8.3 Hz, 1H), 7.01 (t, J = 7.5  
5 Hz, 1H), 6.85 (t, J = 5.4 Hz, 1H), 4.04 (t, J = 6.0 Hz, 2H), 3.30 (dd, J = 7.4, 5.9 Hz, 2H), 1.37 (s,  
6 9H). <sup>13</sup>C NMR (75 MHz, DMSO) δ 167.30, 157.28, 155.65, 133.13, 130.80, 121.71, 120.58,  
7 114.14, 77.92, 67.58, 39.31, 28.23.

8

9 **tert-Butyl (2-(2-((5-nitrothiazol-2-yl)carbamoyl)phenoxy)ethyl)carbamate (3).**

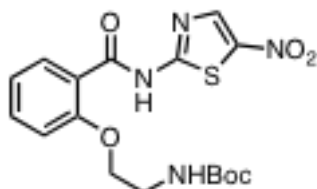

10  
11 General procedure C was used to couple carboxylic acid **2** (1.50 g, 5.33 mmol) to 2-  
12 Amino-5-nitrothiazole to yield 827 mg of the title compound. 38%. Tan solid. <sup>1</sup>H NMR (300  
13 MHz, DMSO) δ 12.75 (s, 1H), 8.69 (s, 1H), 7.71 (dd, J = 7.6, 1.7 Hz, 1H), 7.59 (t, J = 7.9 Hz,  
14 1H), 7.24 (d, J = 8.4 Hz, 1H), 7.11 (t, J = 7.5 Hz, 1H), 7.05 (t, J = 5.4 Hz, 1H), 4.15 (t, J = 5.7  
15 Hz, 2H), 3.34 (d, J = 5.9, 5.1 Hz, 2H), 1.34 (s, 9H). <sup>13</sup>C NMR (75 MHz, DMSO) δ 165.66,  
16 161.55, 156.46, 155.70, 142.81, 141.94, 134.16, 130.60, 121.01, 120.87, 113.17, 77.90, 67.58,  
17 39.23, 28.16.

18

19 **2-(2-Aminoethoxy)-N-(5-nitrothiazol-2-yl)benzamide hydrochloride (VPC161219).**

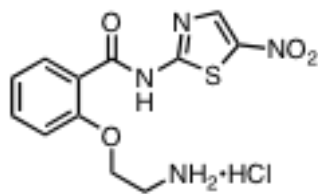

1

2 General procedure D was used to deprotect N-Boc **3** (1.34 g, 3.23 mmol) to yield 1.12 g

3 of the title compound. 100%. Tan solid. <sup>1</sup>H NMR (300 MHz, DMSO) δ 12.94 (s, 1H), 8.71 (s,

4 1H), 8.24 (s, 3H), 7.69 (d, J = 7.6 Hz, 1H), 7.62 (t, J = 7.2 Hz, 1H), 7.25 (d, J = 8.4 Hz, 1H), 7.15

5 (t, J = 7.5 Hz, 1H), 4.35 (t, J = 4.8 Hz, 2H), 3.24 (m, 2H). <sup>13</sup>C NMR (75 MHz, DMSO) δ 165.79,

6 161.78, 155.66, 142.79, 141.88, 134.06, 130.75, 121.57, 121.27, 113.16, 65.16, 38.19.

7

8 **tert-Butyl (2-(2-((3,5-dinitrothiophen-2-yl)carbamoyl)phenoxy)ethyl)carbamate (4).**

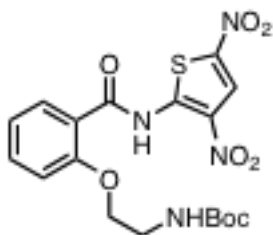

9

10 General procedure C was used to couple carboxylic acid **2** (969 mg, 3.45 mmol) to 3,5-

11 dinitrothiophen-2-amine to yield 1.055 g of the title compound. 68%. Yellow solid. <sup>1</sup>H NMR

12 (500 MHz, DMSO) δ 13.04 (s, J = 49.8 Hz, 1H), 8.58 (s, 1H), 8.11 (d, J = 7.8 Hz, 1H), 7.72 (dd,

13 J = 11.3, 4.3 Hz, 1H), 7.40 (d, J = 8.4 Hz, 1H), 7.21 (t, J = 7.5 Hz, 1H), 7.06 (t, J = 5.6 Hz, 1H),

14 4.43 (t, J = 4.8 Hz, 2H), 3.44 (dd, J = 5.3, 4.8 Hz, 2H), 1.25 (s, J = 23.1 Hz, 9H). <sup>13</sup>C NMR (126

15 MHz, DMSO) δ 163.54, 157.32, 155.69, 146.62, 138.96, 136.29, 132.31, 130.05, 123.03, 121.81,

16 117.28, 113.93, 77.78, 69.10, 38.58, 28.01.

17

18 **2-(2-Aminoethoxy)-N-(3,5-dinitrothiophen-2-yl)benzamide hydrochloride (VPC16b2031).**



1 **2-(4-((tert-Butoxycarbonyl)amino)butoxy)benzoic acid (6).**

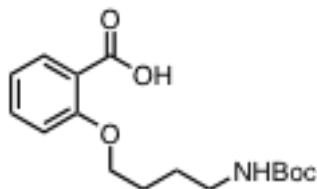

2  
3 General procedure B was used to hydrolyze methyl ester **5** (1.20 g, 3.71 mmol) to yield  
4 1.128 g of the title compound. 98%. Amber wax. <sup>1</sup>H NMR (300 MHz, DMSO) δ 12.49 (s, 1H),  
5 7.60 (d, J = 6.1 Hz, 1H), 7.47 (t, J = 7.8 Hz, 1H), 7.10 (d, J = 8.4 Hz, 1H), 6.97 (t, J = 7.5 Hz,  
6 1H), 6.84 (t, J = 5.4 Hz, 1H), 4.01 (t, J = 6.3 Hz, 2H), 2.96 (dd, J = 6.4, 6.2 Hz, 2H), 1.68 (dt, J =  
7 6.4 Hz, 2H), 1.53 (dt, J = 7.0 Hz, 2H), 1.37 (s, 9H). <sup>13</sup>C NMR (75 MHz, DMSO) δ 167.44,  
8 157.36, 155.63, 132.86, 130.53, 121.66, 119.96, 113.41, 77.36, 67.94, 39.50, 28.27, 26.02.

9  
10 **tert-butyl (4-(2-((5-nitrothiazol-2-yl)carbamoyl)phenoxy)butyl)carbamate (7).**

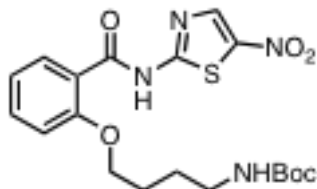

11  
12 General procedure C was used to couple carboxylic acid **6** (1.10 g, 3.56 mmol) to 2-  
13 Amino-5-nitrothiazole to yield 567 mg of the title compound. 37%. Beige solid. <sup>1</sup>H NMR (500  
14 MHz, DMSO) δ 12.70 (s, 1H), 8.66 (s, 1H), 7.73 (d, J = 7.6 Hz, 1H), 7.59 (t, J = 7.9 Hz, 1H),  
15 7.23 (d, J = 8.4 Hz, 1H), 7.11 (t, J = 7.5 Hz, 1H), 6.81 – 6.72 (m, 1H), 4.14 (t, J = 6.3 Hz, 2H),  
16 2.95 (dd, J = 6.3, 6.2 Hz, 2H), 1.83 – 1.70 (m, 2H), 1.53 (dt, J = 7.0, 6.7 Hz, 2H), 1.34 (s, 9H).  
17 <sup>13</sup>C NMR (126 MHz, DMSO) δ 165.52, 161.33, 156.81, 155.57, 142.76, 142.01, 134.19, 130.37,  
18 120.70, 113.22, 77.36, 68.37, 39.51, 28.22, 25.89.

19

1 **2-(4-aminobutoxy)-N-(5-nitrothiazol-2-yl)benzamide (VPC162096).**

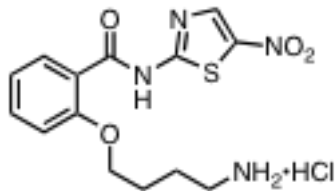

2  
3 General procedure D was used to deprotect N-Boc **7** (500 mg, 1.15 mmol) to yield 427  
4 mg of the title compound. 100%. Beige solid. <sup>1</sup>H NMR (500 MHz, DMSO) δ 12.78 (s, 1H),  
5 8.67 (s, 1H), 7.80 (s, 3H), 7.71 (dd, J = 7.6, 1.0 Hz, 1H), 7.65 – 7.55 (m, 1H), 7.21 (t, J = 22.6  
6 Hz, 1H), 7.11 (t, J = 7.5 Hz, 1H), 4.16 (t, J = 6.2 Hz, 2H), 2.91 – 2.80 (m, 2H), 1.91 – 1.78 (m,  
7 2H), 1.70 (dt, J = 7.4, 7.4 Hz, 2H). <sup>13</sup>C NMR (126 MHz, DMSO) δ 165.46, 161.24, 156.56,  
8 142.71, 141.87, 134.05, 130.23, 120.72, 120.65, 113.18, 67.85, 38.19, 25.38, 23.40.

9  
10 **Methyl 3-(2-((tert-butoxycarbonyl)amino)ethoxy)thiophene-2-carboxylate (8).**

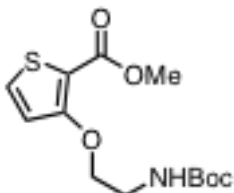

11  
12 General procedure A was used to couple methyl 3-hydroxythiophene-2-carboxylate (1.0  
13 g, 6.32 mmol) and *tert*-butyl (2-bromoethyl)carbamate. Purified by flash chromatography (10 –  
14 50 % ethyl acetate / hexanes) to yield 1.89 g of the title compound. 99%. Thick amber oil. <sup>1</sup>H  
15 NMR (500 MHz, DMSO) δ 7.81 (d, J = 5.6 Hz, 1H), 7.11 (d, J = 5.5 Hz, 1H), 6.91 (t, J = 5.5 Hz,  
16 1H), 4.12 (t, J = 6.0 Hz, 2H), 3.72 (s, 3H), 3.27 (q, J = 5.9 Hz, 2H), 1.37 (s, 9H). <sup>13</sup>C NMR (126  
17 MHz, DMSO) δ 161.32, 160.87, 155.63, 132.03, 118.22, 108.73, 77.88, 70.00, 51.38, 39.40,  
18 28.19.

19



1 **3-(2-((tert-butoxycarbonyl)amino)ethoxy)thiophene-2-carboxylic acid (9).**

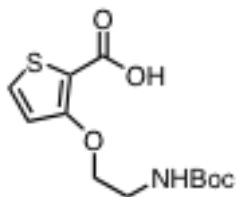

2  
3 General procedure B was used to hydrolyze methyl ester **8** (1.84 g, 6.11 mmol) to yield  
4 1.43 g of the title compound. 82%. White solid. <sup>1</sup>H NMR (500 MHz, DMSO) δ 12.43 (s, 1H),  
5 7.74 (d, J = 5.5 Hz, 1H), 7.08 (d, J = 5.5 Hz, 1H), 6.91 (t, J = 5.5 Hz, 1H), 4.10 (t, J = 6.1 Hz,  
6 2H), 3.25 (q, J = 6.0 Hz, 2H), 1.37 (s, 9H). <sup>13</sup>C NMR (126 MHz, DMSO) δ 162.42, 160.29,  
7 155.68, 131.30, 118.42, 110.48, 77.93, 70.04, 39.45, 28.24.

8  
9 **tert-Butyl (2-((2-((5-nitrothiazol-2-yl)carbamoyl)thiophen-3-yl)oxy)ethyl)carbamate (10).**

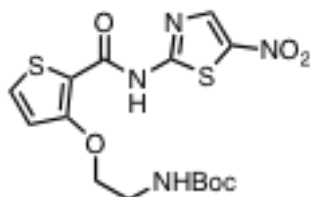

10  
11 General procedure C was used to couple carboxylic acid **9** (100 mg, 0.35 mmol) to 2-  
12 Amino-5-nitrothiazole to yield 87 mg of the title compound. 60%. White solid. <sup>1</sup>H NMR (500  
13 MHz, DMSO) δ 11.30 (s, 1H), 8.67 (s, 1H), 8.06 (d, J = 5.5 Hz, 1H), 7.32 – 7.20 (m, 2H), 4.34  
14 (t, J = 5.1 Hz, 2H), 3.39 (dd, J = 10.5, 5.2 Hz, 2H), 1.33 (s, 9H). <sup>13</sup>C NMR (126 MHz, DMSO) δ  
15 160.89, 159.43, 159.08, 155.82, 142.54, 134.92, 117.67, 78.00, 71.87, 39.33, 28.11.

16  
17 **3-(2-aminoethoxy)-N-(5-nitrothiazol-2-yl)thiophene-2-carboxamide hydrochloride**  
18 **(VPC162125).**

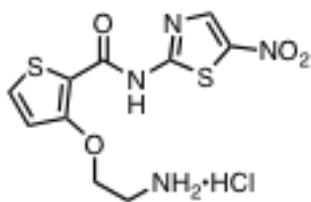

1  
2 General procedure D was used to deprotect N-Boc **10** (25 mg, 0.060 mmol) to yield 21  
3 mg of the title compound. 100%. Pale yellow solid. <sup>1</sup>H NMR (500 MHz, DMSO) δ 11.62 (s,  
4 1H), 8.70 (s, 1H), 8.51 (s, 3H), 8.20 – 7.93 (m, 1H), 7.39 – 7.15 (m, 1H), 4.61 – 4.45 (m, 2H),  
5 2.69 – 2.21 (m, 2H). <sup>13</sup>C NMR (126 MHz, DMSO) δ 160.87, 159.32, 157.78, 142.37, 141.94,  
6 134.83, 117.50, 111.79, 68.71, 38.16.

7  
8 **Methyl 2-(3-((tert-butoxycarbonyl)amino)propyl)benzoate (11).**

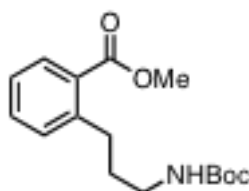

9  
10 *tert*-Butyl allylcarbamate (113 mg, 0.72 mmol) and THF (1.5 mL) were charged into a  
11 flame-dried round bottom flask followed by the dropwise addition of 0.5M 9-BBN in THF (1.92  
12 mL). After 2 h, 2M Cs<sub>2</sub>CO<sub>3</sub> (0.72 mL), methyl 2-iodobenzoate (0.07 mL, 0.48 mmol) and  
13 Pd(dppf)Cl<sub>2</sub> (27.7 mg, 5 mol%) were added to the flask and held at room temperature. Once  
14 judged complete by TLC (~24 h), the crude mixture was diluted with EtOAc (30 mL) and  
15 washed with sat. NH<sub>4</sub>Cl (2 x 20 mL) and brine (2 x 20 mL) then dried (MgSO<sub>4</sub>) followed by  
16 filtration and evaporation to dryness. The resulting residue was purified by gradient flash column  
17 chromatography (5-30% EtOAc/hexanes) to yield 130 mg of methyl 2-(3-*tert*-  
18 butoxycarbonylamino)propyl)benzoate. 93%. Amber oil. <sup>1</sup>H NMR (500 MHz, DMSO) δ 7.76  
19 (dd, J = 7.8, 1.1 Hz, 1H), 7.49 (td, J = 7.5, 1.4 Hz, 1H), 7.39 – 7.26 (m, 2H), 6.85 (t, J = 5.3 Hz,

1 1H), 3.82 (s, 3H), 2.93 (dd, J = 6.7, 6.2 Hz, 2H), 2.87 – 2.81 (m, 2H), 1.62 (dt, J = 7.4, 7.4 Hz,  
2 2H), 1.37 (s, 9H). <sup>13</sup>C NMR (126 MHz, DMSO) δ 167.52, 155.57, 142.96, 132.03, 130.91,  
3 130.07, 129.41, 126.11, 77.38, 51.97, 39.77, 31.61, 30.99, 28.27.

4

5 **2-(3-((tert-Butoxycarbonyl)amino)propyl)benzoic acid (12).**

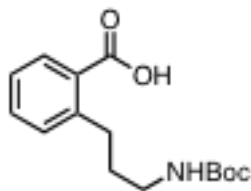

6

7 General procedure B was used to hydrolyze methyl ester **11** (130 mg, 0.45 mmol) to yield  
8 120 mg of the title compound. 96%. White solid. <sup>1</sup>H NMR (500 MHz, DMSO) δ 12.82 (s, 1H),  
9 7.77 (dd, J = 7.7, 1.1 Hz, 1H), 7.45 (td, J = 7.5, 1.3 Hz, 1H), 7.35 – 7.23 (m, 2H), 6.81 (t, J = 5.3  
10 Hz, 1H), 2.98 – 2.84 (m, 4H), 1.64 (dt, J = 7.4, 7.4 Hz, 2H), 1.37 (s, 9H). <sup>13</sup>C NMR (126 MHz,  
11 DMSO) δ 168.83, 155.55, 142.88, 131.58, 130.78, 130.47, 130.21, 125.93, 77.38, 39.83, 31.53,  
12 30.88, 28.27.

13

14 **tert-Butyl (3-(2-((5-nitrothiazol-2-yl)carbamoyl)phenyl)propyl)carbamate (13).**

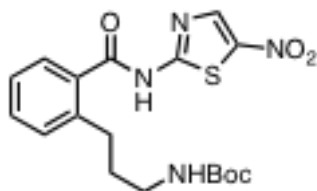

15

16 General procedure C was used to couple carboxylic acid **12** (95 mg, 0.34 mmol) to 2-  
17 Amino-5-nitrothiazole to yield 58 mg of the title compound. 42%. Light yellow solid. <sup>1</sup>H NMR  
18 (500 MHz, DMSO) δ 13.54 (s, 1H), 8.69 (s, 1H), 7.60 (d, J = 7.6 Hz, 1H), 7.51 (t, J = 7.6 Hz,  
19 1H), 7.41 – 7.33 (m, 2H), 6.81 (t, J = 5.5 Hz, 1H), 2.91 (dd, J = 6.5, 6.3 Hz, 2H), 2.79 – 2.68 (m,

1 2H), 1.68 – 1.57 (m, 2H), 1.34 (s, 9H). <sup>13</sup>C NMR (126 MHz, DMSO) δ 168.72, 161.99, 155.53,  
2 142.62, 142.03, 141.15, 132.26, 131.45, 130.16, 128.45, 125.88, 77.34, 39.67, 31.46, 30.00,  
3 28.20.

4

5 **2-(3-Aminopropyl)-N-(5-nitrothiazol-2-yl)benzamide hydrochloride (VPC162134 /**  
6 **Amixicile).**

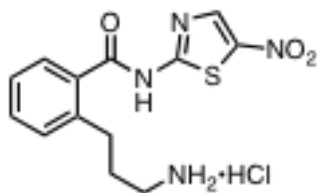

8 General procedure D was used to deprotect N-Boc **13** (310 mg, 0.76 mmol) to yield 257  
9 mg of the title compound. 98%. Pale yellow solid. <sup>1</sup>H NMR (500 MHz, DMSO-*d*<sub>6</sub>) δ 13.60 (s,  
10 1H), 8.71 (s, 1H), 8.05 (bs, 3H), 7.65 (d, J = 7.7 Hz, 1H), 7.55 (t, J = 7.6 Hz, 1H), 7.47 – 7.35  
11 (m, 2H), 2.81 (t, J = 7.5 Hz, 2H), 2.79 – 2.71 (m, 2H), 1.87 (quint., J = 7.5 Hz, 2H); <sup>13</sup>C NMR  
12 (125 MHz, DMSO-*d*<sub>6</sub>) δ 168.6, 162.1, 142.7, 142.0, 140.3, 132.2, 131.7, 130.2, 128.8, 126.3,  
13 38.4, 29.6, 28.9; HRMS (ESI) calcd for [C<sub>13</sub>H<sub>14</sub>N<sub>4</sub>O<sub>3</sub>S + H]<sup>+</sup> 307.0859, found 307.0855.

14

15

## REFERENCES

16

17 1. Ballard, T. E., X. Wang, I. Olekhovich, T. Koerner, C. Seymour, J. Salamoun, M.  
18 Warthan, P. S. Hoffman, T. L. Macdonald. 2011. Synthesis and Antimicrobial Evaluation of  
19 Nitazoxanide-Based Analogues: Identification of Selective and Broad Spectrum Activity.  
20 ChemMedChem. 6:362-377.

21

22

23

24

25

1  
2  
3  
4

**S2. Clinical score matrix.**

**Clinical Scoring System for Mice Infected with *Clostridium difficile***

| Category           | Scores* |                                   |                                   |                             |            |
|--------------------|---------|-----------------------------------|-----------------------------------|-----------------------------|------------|
|                    | 0       | 1                                 | 2                                 | 3                           | 4          |
| <i>Weight loss</i> | None    | <10%                              | 10-15%                            | 15-20%                      | >20%       |
| <i>Activity</i>    | Normal  | Alert/slow moving                 | Lethargic/shaky                   | Inactive unless prodded     | Not moving |
| <i>Posture</i>     | Normal  | Back slanted                      | Hunched                           | Hunched/nose down           |            |
| <i>Coat</i>        | Normal  | Piloerection                      | Rough skin                        | Very ruffled/puff/Ungroomed |            |
| <i>Diarrhea</i>    | Normal  | Soft stool/discolored (yellowish) | Wet stained tail/mucous +/- blood | Liquid/no stool (ileus)     |            |
| <i>Eyes/Nose</i>   | Normal  | Squinted ½ closed                 | Squinted/discharge                | Closed/discharge            |            |

\*Clinical Score=sum of all parameter scores. Total possible score=20. Normal=0; Found dead=20. Mice with score of  $\geq 14$  are euthanized.

5  
6  
7  
8  
9  
10
